# Supplementary material for: Visualising and semi-quantitatively measuring brain fluid pathways, including meningeal lymphatics, in humans using widely available MRI techniques
Source: PubMed Central journal article supplement (PMC10581238; doi:10.1177/0271678x231179555), 2023-05-31
Supplement: sj-pdf-1-jcb-10.1177_0271678X231179555.pdf [file sj-pdf-1-jcb-10.1177_0271678X231179555.pdf]

## Supplementary material

*Visualising and semi-quantitatively measuring brain fluid pathways, including meningeal lymphatics, in humans using widely available MRI techniques*

**Supplementary table 1.** Overview of the initial search process.

| Date       | Search terms                 | Filters                             | Resulting number of papers | Number deemed as relevant and assessed in detail |
|------------|------------------------------|-------------------------------------|----------------------------|--------------------------------------------------|
| 2022-05-30 | Glymphatic system            | Only review papers, Last five years | 261                        | 10                                               |
| 2022-06-06 | Brain fluid homeostasis      | Only review papers, Last five years | 210                        | 14                                               |
| 2022-06-06 | Brain fluid transport        | Only review papers, Last five years | 290                        | 15                                               |
| 2022-06-12 | Meningeal lymphatics         | Only review papers, Last five years | 107                        | 20                                               |
| 2022-06-12 | Meningeal lymphatics imaging | Only review papers, Last five years | 19                         | 3                                                |
| 2022-06-15 | Glymphatic imaging           | Only review papers, Last five years | 78                         | 3                                                |

**Supplementary table 2.** Example images guiding qualitative (visual) scoring (1–4) of signal intensity in the different areas of assessment.

|                                        | Signal intensity score                                                              |                                                                                     |                                                                                      |                                                                                       |
|----------------------------------------|-------------------------------------------------------------------------------------|-------------------------------------------------------------------------------------|--------------------------------------------------------------------------------------|---------------------------------------------------------------------------------------|
|                                        | 1                                                                                   | 2                                                                                   | 3                                                                                    | 4                                                                                     |
| Superior Sagittal Sinus (Middle)       | 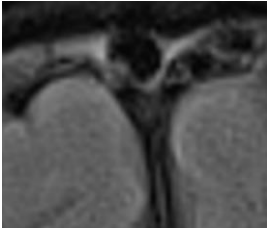   |    |    |    |
| Torcula                                |    |    |    |    |
| Cribriform plate                       |   |   |   |   |
| Jugular foramen                        |  |  |  |  |
| Superficial cortical perivenous spaces |  |  |  |  |

**Supplementary table 3.** Correlation matrix of absolute post-contrast semi-quantitative signal intensity (SI) and in change in SI between pre- and post-contrast measurement (relative to pre-contrast absolute SI) in areas of assessment. Pearson's correlation coefficient. N=19. There was significant correlation between the dorsal areas (the Torcula and the anterior, middle, and posterior superior sagittal sinus).

SI=Signal intensity.

|                                                  | Superior sagittal sinus |               |               | Torcula      | Cribriform plate | Jugular foramen | Superficial cortical perivenous spaces |
|--------------------------------------------------|-------------------------|---------------|---------------|--------------|------------------|-----------------|----------------------------------------|
|                                                  | Anterior                | Middle        | Posterior     |              |                  |                 |                                        |
| <b>Superior sagittal sinus</b>                   |                         |               |               |              |                  |                 |                                        |
| <b>Anterior</b>                                  |                         |               |               |              |                  |                 |                                        |
| Post-contrast SI                                 | 1                       | <b>0.54*</b>  | <b>0.67**</b> | <b>0.49*</b> | 0.05             | 0.33            | 0.20                                   |
| Change in SI                                     | 1                       | 0.07          | 0.17          | -0.05        | 0.01             | 0.05            | 0.02                                   |
| <b>Middle</b>                                    |                         |               |               |              |                  |                 |                                        |
| Post-contrast SI                                 | <b>0.54*</b>            | 1             | <b>0.65**</b> | 0.41         | 0.07             | <b>0.58*</b>    | 0.10                                   |
| Change in SI                                     | 0.07                    | 1             | 0.34          | <b>0.56*</b> | 0.03             | -0.09           | -0.08                                  |
| <b>Posterior</b>                                 |                         |               |               |              |                  |                 |                                        |
| Post-contrast SI                                 | <b>0.67**</b>           | <b>0.65**</b> | 1             | 0.33         | -0.08            | 0.09            | 0.05                                   |
| Change in SI                                     | 0.17                    | 0.34          | 1             | 0.38         | 0.40             | -0.17           | 0.12                                   |
| <b>Torcula</b>                                   |                         |               |               |              |                  |                 |                                        |
| Post-contrast SI                                 | <b>0.49*</b>            | 0.41          | 0.33          | 1            | 0.03             | 0.24            | 0.37                                   |
| Change in SI                                     | -0.05                   | <b>0.56*</b>  | 0.38          | 1            | 0.09             | 0.07            | 0.34                                   |
| <b>Cribriform plate</b>                          |                         |               |               |              |                  |                 |                                        |
| Post-contrast SI                                 | 0.05                    | 0.07          | -0.08         | 0.03         | 1                | 0.10            | -0.10                                  |
| Change in SI                                     | 0.01                    | 0.03          | 0.40          | 0.09         | 1                | -0.07           | -0.19                                  |
| <b>Jugular foramen</b>                           |                         |               |               |              |                  |                 |                                        |
| Post-contrast SI                                 | 0.33                    | <b>0.58*</b>  | 0.09          | 0.24         | 0.11             | 1               | 0.27                                   |
| Change in SI                                     | -0.06                   | -0.14         | -0.31         | -0.05        | 0.06             | 1               | 0.01                                   |
| <b>Superficial cortical perivenous spaces ^^</b> |                         |               |               |              |                  |                 |                                        |
| Post-contrast SI                                 | 0.20                    | 0.10          | 0.05          | 0.37         | -0.10            | 0.27            | 1                                      |
| Change in SI                                     | 0.02                    | -0.08         | 0.12          | 0.34         | -0.19            | 0.01            | 1                                      |

\*p<0.05, \*\*p<0.01, ^^n=16

**Supplementary table 4.** Median semi-quantitative signal intensity values in arbitrary units (pre- and post-contrast with the interquartile range [IQR]) on the first, second, third measurement and reliability measures: mean differences between each pair of measurements and intraclass correlation coefficient [ICC] of all three. N=19.

CI=confidence interval, ICC= intraclass correlation coefficient, IQR=interquartile range

|                                | Measurement     |                 |                 |               | Mean differences (95% CI) between pairs of measurements.<br>Absolute numbers |                                                   |                                                | ICC  |
|--------------------------------|-----------------|-----------------|-----------------|---------------|------------------------------------------------------------------------------|---------------------------------------------------|------------------------------------------------|------|
|                                | 1 <sup>st</sup> | 2 <sup>nd</sup> | 3 <sup>rd</sup> | Mean          | <i>Proportional to the mean of the two measurements</i>                      |                                                   |                                                |      |
|                                |                 |                 |                 |               | 1 <sup>st</sup> - 2 <sup>nd</sup>                                            | 1 <sup>st</sup> - 3 <sup>rd</sup>                 | 2 <sup>nd</sup> -3 <sup>rd</sup>               |      |
| <b>Superior sagittal sinus</b> |                 |                 |                 |               |                                                                              |                                                   |                                                |      |
| <b>Anterior</b>                |                 |                 |                 |               |                                                                              |                                                   |                                                |      |
| Pre-contrast                   | 205 (181–275)   | 205 (175–254)   | 197 (171–229)   | 202 (188–231) | -6.8 (-31.0–17.4)<br><i>-3.1 (14.4–7.9)</i>                                  | 9.8 (-6.7–26.2)<br><i>4.7 (-3.2–12.5)</i>         | 16.5 (-3.1–36.2)<br><i>7.8 (-1.5–17.1)</i>     | 0.88 |
| Post-contrast                  | 401 (334–439)   | 378 (289–439)   | 368 (316–393)   | 379 (313–434) | -8.1 (-32.1–15.8)<br><i>-4.2 (-16.5–8.2)</i>                                 | 13.0 (-11.7–37.6)<br><i>7.1 (6.0–20.1)</i>        | 21.1 (0.1–42.1)<br><i>9.8 (0.1–22.3)</i>       | 0.95 |
| <b>Middle</b>                  |                 |                 |                 |               |                                                                              |                                                   |                                                |      |
| Pre-contrast                   | 295 (242–324)   | 273 (239–330)   | 269 (229–320)   | 270 (252–334) | 0.7 (-19.0–20.5)<br><i>0.5 (-13.3–14.0)</i>                                  | 12.2 (-6.3–30.6)<br><i>8.9 (-0.5–21.9)</i>        | 11.4 (-9.6–32.5)<br><i>8.3 (-7.0–24.6)</i>     | 0.91 |
| Post-contrast                  | 544 (483–693)   | 521 (428–665)   | 513 (458–639)   | 532 (463–714) | 40.8 (-4.9–86.5)<br><i>7.1 (-0.9–15.1)</i>                                   | 35.7 (3.0–68.5) *<br><i>6.2 (0.5–11.9) *</i>      | -5.1 (-42.4–32.2)<br><i>-0.9 (-7.6–5.8)</i>    | 0.96 |
| <b>Posterior</b>               |                 |                 |                 |               |                                                                              |                                                   |                                                |      |
| Pre-contrast                   | 192 (155–226)   | 188 (158–252)   | 193 (162–227)   | 193 (151–228) | -1.0 (-14.2–12.2)<br><i>-0.5 (-7.2–6.2)</i>                                  | -6.3 (-22.3–9.8)<br><i>-3.2 (-11.0–5.0)</i>       | -5.3 (-20.4–9.8)<br><i>-2.6 (-10.1–4.9)</i>    | 0.96 |
| Post-contrast                  | 463 (358–499)   | 462 (349–499)   | 432 (325–469)   | 449 (346–489) | 3.6 (-16.8–24.1)<br><i>0.8 (-3.8–5.5)</i>                                    | 26.8 (-2.4–56.0)<br><i>6.2 (-0.6–13.1)</i>        | 23.2 (-4.3–50.8)<br><i>5.4 (-1.0–11.7)</i>     | 0.96 |
| <b>Torcula</b>                 |                 |                 |                 |               |                                                                              |                                                   |                                                |      |
| Pre-contrast                   | 231 (221–265)   | 240 (194–266)   | 219 (194–238)   | 227 (200–249) | 1.8 (-16.1–19.7) *<br><i>0.8 (-6.9–8.2)</i>                                  | 17.0 (1.7–32.4)<br><i>7.6 (0.8–14.5)</i>          | 15.3 (-4.0–34.5)<br><i>6.8 (-1.8–15.3)</i>     | 0.80 |
| Post-contrast                  | 433 (403–452)   | 404 (368–442)   | 430 (389–481)   | 427 (386–449) | 34.9 (10.1–59.7) **<br><i>8.2 (2.3–14.0) **</i>                              | -1.6 (-22.7–19.5) **<br><i>-0.4 (-5.2–4.3) **</i> | -36.5 (-59.5–13.5)<br><i>-12.7 (-21.1–4.8)</i> | 0.92 |
| <b>Cribriform plate</b>        |                 |                 |                 |               |                                                                              |                                                   |                                                |      |
| Pre-contrast                   | 278 (218–303)   | 235 (186–300)   | 244 (209–303)   | 240 (203–291) | 12.6 (-20.7–46.0)<br><i>0.5 (-7.9–18.3)</i>                                  | 9.6 (-15.2–34.4)<br><i>0.4 (-0.6–13.4)</i>        | -3.1 (-33.7–27.6)<br><i>-0.1 (-13.3–10.9)</i>  | 0.90 |
| Post-contrast                  | 380 (304–479)   | 375 (302–486)   | 427 (329–455)   | 400 (338–474) | -17.9 (-65.8–30.0)<br><i>-0.5 (-18.0–8.3)</i>                                | -32.4 (-81.0–16.2)<br><i>-8.5 (21.4–4.2)</i>      | -68.7 (-142.7–5.3)<br><i>-18.0 (-37.6–0.1)</i> | 0.86 |

|                                                  |               |               |               |               |                      |                      |                   |      |
|--------------------------------------------------|---------------|---------------|---------------|---------------|----------------------|----------------------|-------------------|------|
| <b>Jugular foramen</b>                           |               |               |               |               |                      |                      |                   |      |
| Pre-contrast                                     | 242 (179–273) | 204 (177–235) | 179 (156–242) | 209 (180–242) | 40.6 (3.8–77.3) *    | 47.5 (17.8–77.3) **  | 6.9 (-20.9–34.8)  | 0.71 |
| Post-contrast                                    | 353 (296–469) | 343 (260–385) | 372 (315–437) | 357 (324–421) | 18.2 (0.2–0.35) *    | 22.3 (0.9–36.7) **   | 0.4 (-11.1–18.4)  | 0.73 |
|                                                  |               |               |               |               | 39.3 (-8.7–87.4)     | 2.7 (-47.8–53.3)     | -36.6 (-77.0–3.7) |      |
|                                                  |               |               |               |               | 10.0 (-0.2–24.0)     | 0.1 (12.2–13.8)      | -9.8. (-21.3–0.1) |      |
| <b>Superficial cortical perivenous spaces ^^</b> |               |               |               |               |                      |                      |                   |      |
| Pre-contrast                                     | 114 (101–138) | 120 (102–146) | 120 (103–147) | 120 (33)      | -7.0 (-14.1–0.2)     | -7.2 (-24.9–10.6)    | -0.2 (-14.1–13.8) | 0.82 |
| Post-contrast                                    | 183 (163–261) | 223 (180–287) | 221 (178–273) | 209 (95)      | -0.6 (-11.5–0.2)     | -0.6 (-20.5–8.2)     | -0.2 (-11.2–11.0) | 0.98 |
|                                                  |               |               |               |               | -23.2 (-35.2–11.2)   | -22.3 (-35.2–9.5) ** | 0.9 (-10.5–12.3)  |      |
|                                                  |               |               |               |               | **                   | -9.7 (-15.4–0.4) **  | 0.1 (-0.4–0.5)    |      |
|                                                  |               |               |               |               | -10.0 (-15.4–0.5) ** |                      |                   |      |
| <b>Normal-appearing white matter</b>             |               |               |               |               |                      |                      |                   |      |
| Pre-contrast                                     | 183 (179–199) | 190 (176–204) | 188 (169–207) | 188 (175–204) | 14.1 (-14.3–42.4)    | 24.1 (-7.4–55.5)     | 10.0 (-21.0–41.0) | 0.99 |
| Post-contrast                                    | 200 (175–215) | 193 (179–213) | 191 (178–206) | 196 (176–211) | 7.5 (-7.5–22.6)      | 13.0 (-4.0–30.0)     | 5.3 (-11.1–21.7)  | 0.98 |
|                                                  |               |               |               |               | -2.1 (-7.1–2.8)      | -0.9 (-5.4–3.6)      | 1.2 (-2.1–4.5)    |      |
|                                                  |               |               |               |               | -0.1 (-3.6–1.4)      | -0.4 (-2.8–1.9)      | 0.6 (1.1–2.3)     |      |
| <b>Pituitary stalk</b>                           |               |               |               |               |                      |                      |                   |      |
| Pre-contrast                                     | 378 (335–461) | 386 (342–425) | 351 (324–426) | 373 (338–410) | 14.3 (-14.3–42.4)    | 24.1 (-7.4–55.5)     | 10.0 (-21.0–41.0) | 0.81 |
| Post-contrast                                    | 625 (590–689) | 654 (570–693) | 622 (529–659) | 618 (569–685) | 3.7 (-3.7–11.4)      | 6.7 (-2.1–15.4)      | 2.8 (-5.8–11.4)   | 0.78 |
|                                                  |               |               |               |               | 23.3 (-13.0–59.5)    | 35.9 (-8.1–79.8)     | 12.6 (-39.7–64.9) |      |
|                                                  |               |               |               |               | 3.6 (-2.0–9.3)       | 5.8 (-1.3–12.9)      | 2.0 (-6.1–10.2)   |      |

\* Significant deviation from zero p<0.05, \*\* significant deviation from zero p< 0.01, ^^ n=16

**Supplementary table 5.** Median qualitative (visual) signal intensity scores (pre- and post-contrast) on the first, second, and third measurement and reliability measures (Fleiss' kappa) at the different areas of assessment. Reported as mean (95% confidence interval). N=19

|                                                  | 1 <sup>st</sup> scoring | 2 <sup>nd</sup> scoring | 3 <sup>rd</sup> scoring | Mean             | Fleiss' kappa |
|--------------------------------------------------|-------------------------|-------------------------|-------------------------|------------------|---------------|
| <b>Superior sagittal sinus</b>                   |                         |                         |                         |                  |               |
| <b>Anterior</b>                                  |                         |                         |                         |                  |               |
| Pre-contrast                                     | 1.47 (1.23–1.72)        | 1.26 (0.99–1.53)        | 1.26 (0.99–1.15)        | 1.33 (1.09–1.57) | 0.65          |
| Post-contrast                                    | 2.47 (2.18–2.80)        | 2.37 (2.08–2.66)        | 2.26 (1.95–2.58)        | 2.37 (2.10–2.64) | 0.37          |
| <b>Middle</b>                                    |                         |                         |                         |                  |               |
| Pre-contrast                                     | 1.63 (1.34–1.92)        | 1.63 (1.30–1.96)        | 1.63 (1.34–1.92)        | 1.63 (1.34–1.92) | 0.79          |
| Post-contrast                                    | 3.16 (2.83–3.49)        | 3.00 (2.57–3.43)        | 3.00 (2.64–3.36)        | 3.06 (2.72–3.39) | 0.62          |
| <b>Posterior</b>                                 |                         |                         |                         |                  |               |
| Pre-contrast                                     | 0.89 (0.67–1.12)        | 0.63 (0.34–0.92)        | 0.74 (0.42–1.05)        | 0.75 (0.53–0.98) | 0.32          |
| Post-contrast                                    | 2.47 (2.07–2.88)        | 2.37 (1.97–2.77)        | 2.32 (1.96–2.68)        | 2.39 (2.04–2.73) | 0.46          |
| <b>Torcula</b>                                   |                         |                         |                         |                  |               |
| Pre-contrast                                     | 0.74 (0.52–0.95)        | 0.42 (0.18–0.67)        | 0.37 (0.13–0.61)        | 0.51 (0.31–0.70) | 0.44          |
| Post-contrast                                    | 2.37 (2.04–2.70)        | 1.84 (1.47–2.21)        | 1.95 (1.57–2.32)        | 2.05 (1.73–2.38) | 0.36          |
| <b>Cribriform plate</b>                          |                         |                         |                         |                  |               |
| Pre-contrast                                     | 1.37 (1.00–1.74)        | 1.21 (0.87–1.55)        | 1.21 (0.83–1.59)        | 1.26 (0.94–1.58) | 0.39          |
| Post-contrast                                    | 2.16 (1.67–2.65)        | 2.32 (1.83–2.80)        | 2.16 (1.68–2.65)        | 2.28 (1.83–2.73) | 0.30          |
| <b>Jugular foramen</b>                           |                         |                         |                         |                  |               |
| Pre-contrast                                     | 1.29 (1.02–1.56)        | 1.26 (0.99–1.53)        | 1.16 (0.87–1.45)        | 1.24 (1.02–1.45) | 0.25          |
| Post-contrast                                    | 2.34 (2.00–2.73)        | 2.47 (2.04–2.91)        | 2.58 (2.18–2.98)        | 2.46 (2.16–2.78) | 0.25          |
| <b>Superficial cortical perivenous spaces ^^</b> |                         |                         |                         |                  |               |
| Pre-contrast                                     | 1.11 (0.88–1.34)        | 1.28 (1.01–1.55)        | 1.24 (0.98–1.50)        | 1.23 (0.99–1.47) | 0.32          |
| Post-contrast                                    | 2.05 (1.67–2.42)        | 2.30 (1.98–2.63)        | 2.90 (1.96–2.62)        | 2.20 (1.84–2.55) | 0.9           |

^^ n=16

## **List of members of the Mild Stroke Study 3 (MSS-3) Investigator group**

Una Clancy<sup>1</sup>  
Daniela Jaime Garcia<sup>1</sup>  
Carmen Arteaga<sup>1</sup>  
Michael Stringer<sup>1</sup>  
Michael J. Thrippleton<sup>1</sup>  
Maria C. Valdés-Hernández <sup>1</sup>  
Stewart Wiseman<sup>1</sup>  
Susana Muñoz Maniega<sup>1</sup>  
Olivia K.L. Hamilton<sup>1</sup>  
Francesca M. Chappell<sup>1</sup>  
Rosalind Brown<sup>1</sup>  
Gordon Blair<sup>1</sup>  
Will Hewins<sup>1</sup>  
Emilie Sleight<sup>1</sup>  
Tom MacGillivray<sup>1</sup>  
Charlene Hamid<sup>1</sup>  
Alasdair G. Morgan<sup>1</sup>  
Cameron Manning<sup>1</sup>  
Angela Jochems<sup>1</sup>  
Ellen Backhouse<sup>1</sup>  
Dillys Liu, Hong Kong, China  
Junfang Zhang, Shanghai, China  
Yajun Cheng, Chengdu, China  
Iona Hamilton<sup>1</sup>  
Dominic Job<sup>1</sup>  
David Perry<sup>1</sup>  
Ian Marshall<sup>1</sup>  
Rachel Penman<sup>1</sup>  
Fergus N. Doubal<sup>1</sup>  
Joanna M. Wardlaw<sup>1</sup>

<sup>1</sup> Centre for Clinical Brain Sciences, University of Edinburgh
